# Supplementary material
Source: Springer Nature journal article supplement (https://www.springermedizin.de/resource/supplementary/12937_2010_322_MOESM3_ESM.pdf/25654864)

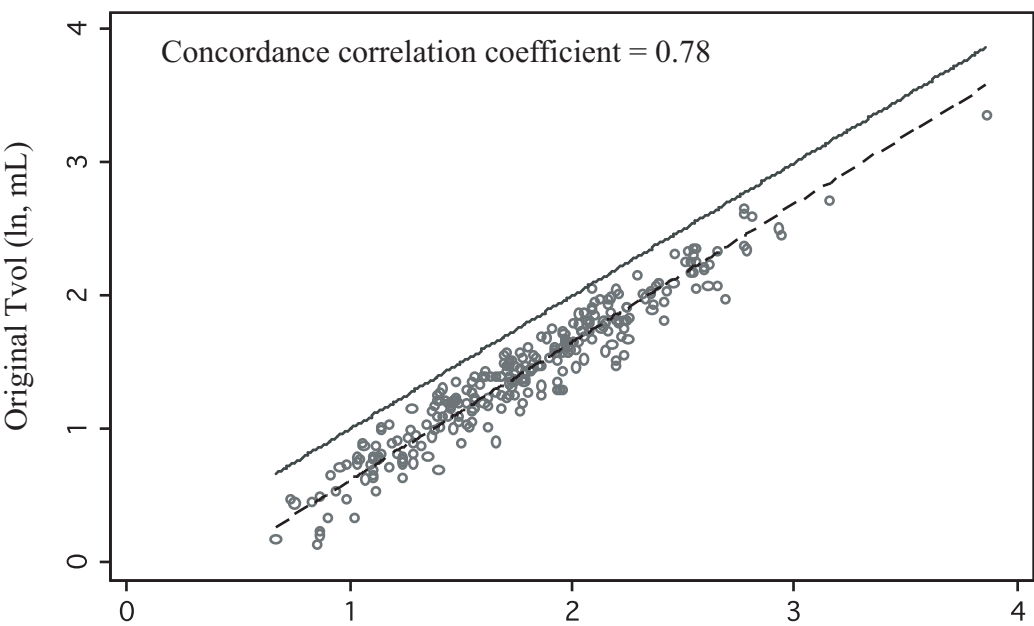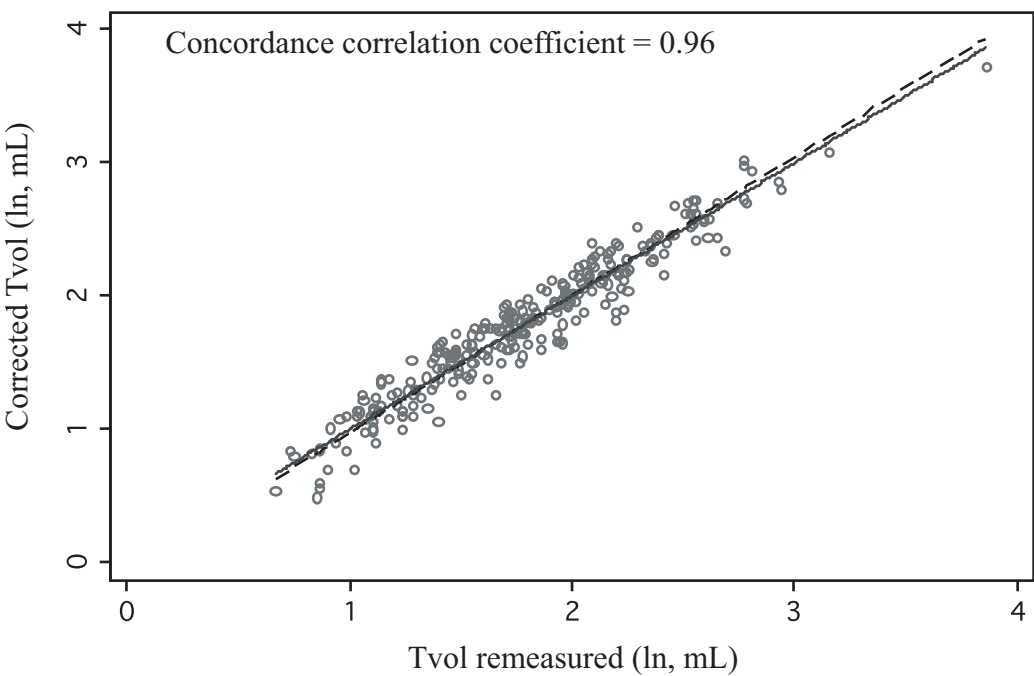

----- reduced major axis      ——— line of perfect concordance

Supplement: MOESM3 [file 25654864]
